# Supplementary material
Source: PubMed Central journal article supplement (PMC3296256)
Supplement: supp_111.137315_137315SI.pdf [file supp_111.137315_137315SI.pdf]

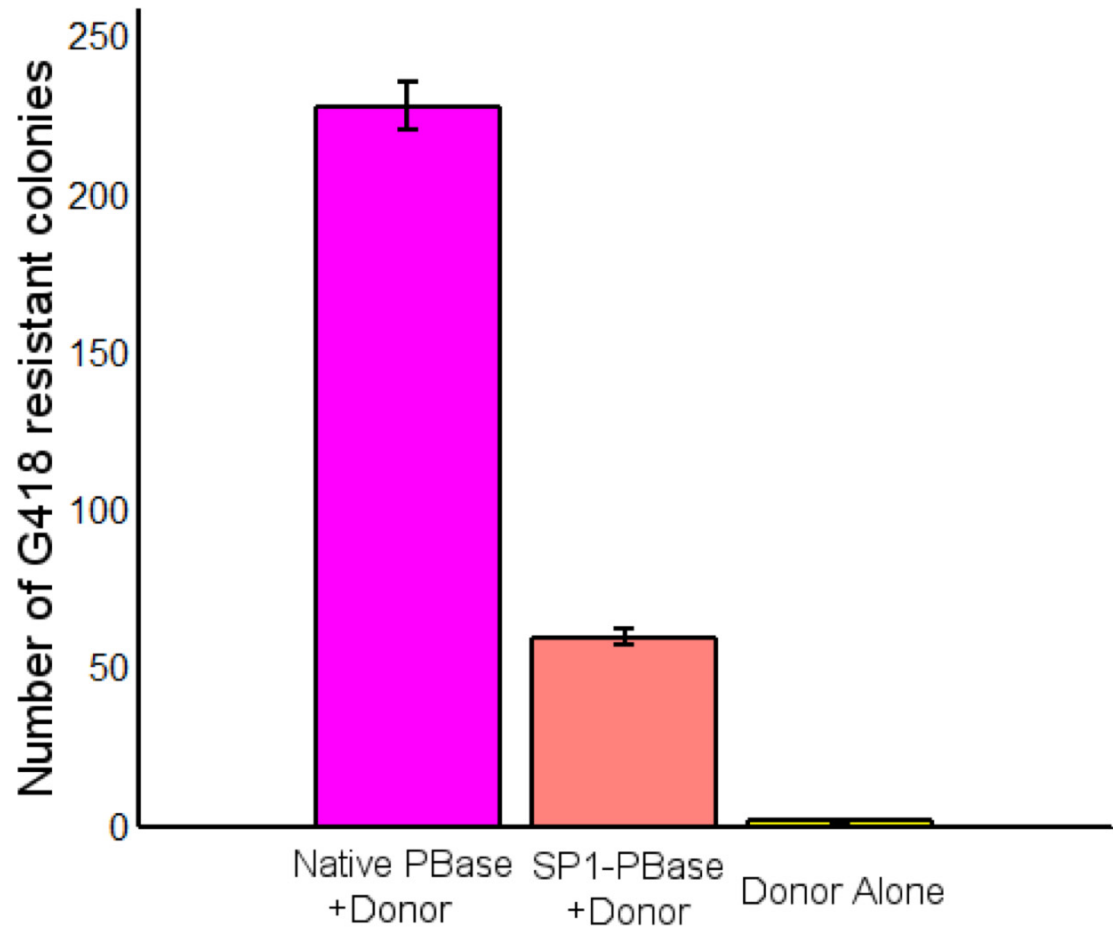

Figure S1

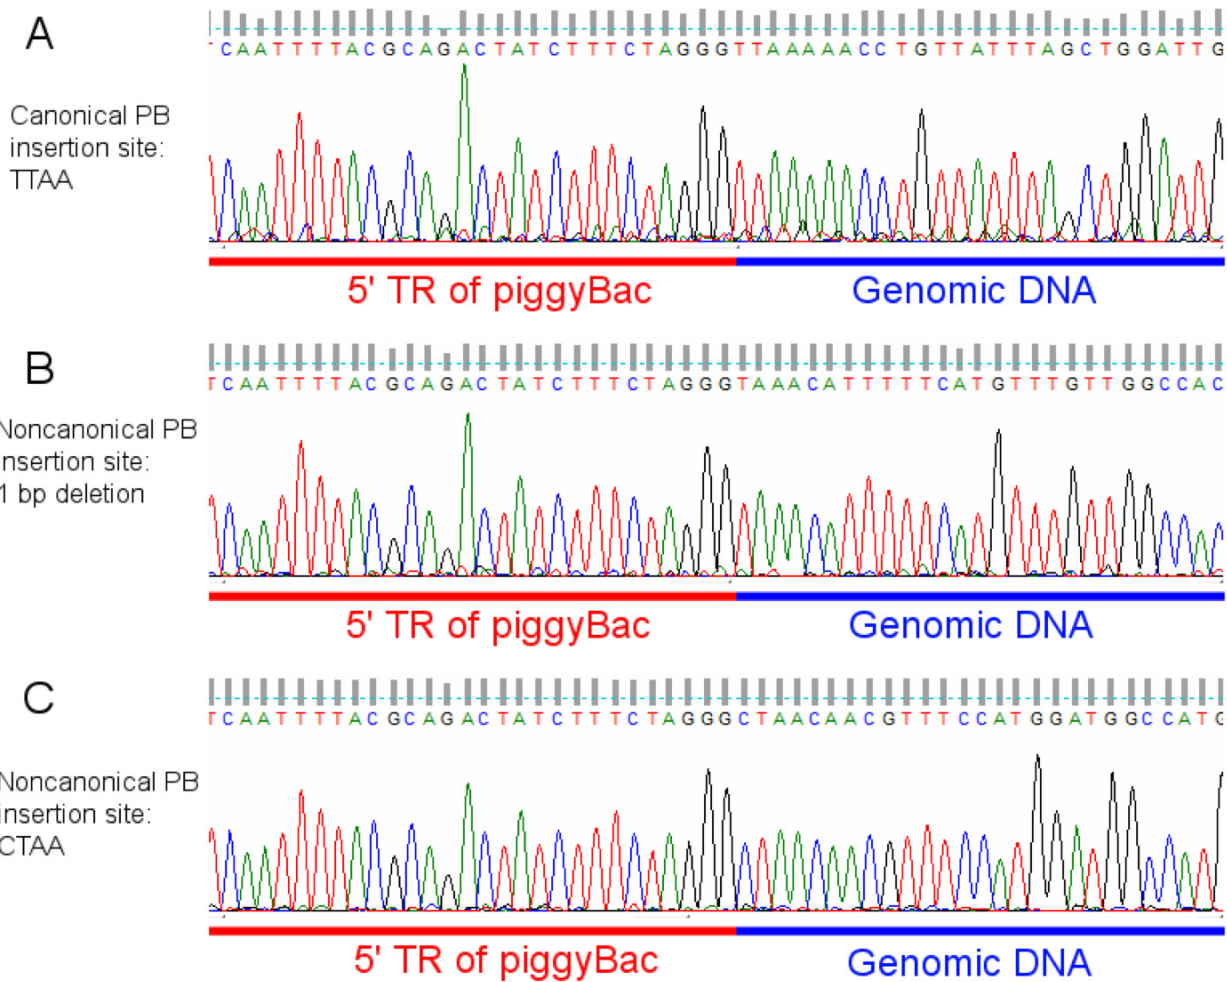

Figure S2

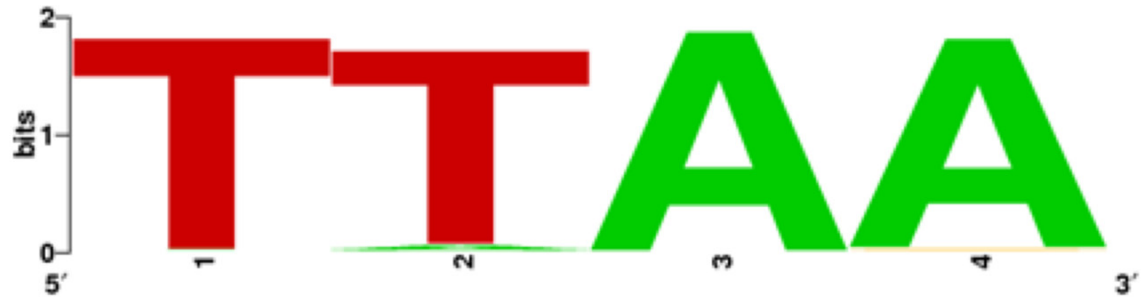

|   | A       | C       | G       | T       |
|---|---------|---------|---------|---------|
| 1 | 0.01153 | 0.00535 | 0.00155 | 0.98157 |
| 2 | 0.03691 | 0.00296 | 0.00150 | 0.95863 |
| 3 | 0.98946 | 0.00106 | 0.00250 | 0.00699 |
| 4 | 0.97966 | 0.00222 | 0.01290 | 0.00522 |

Figure S3

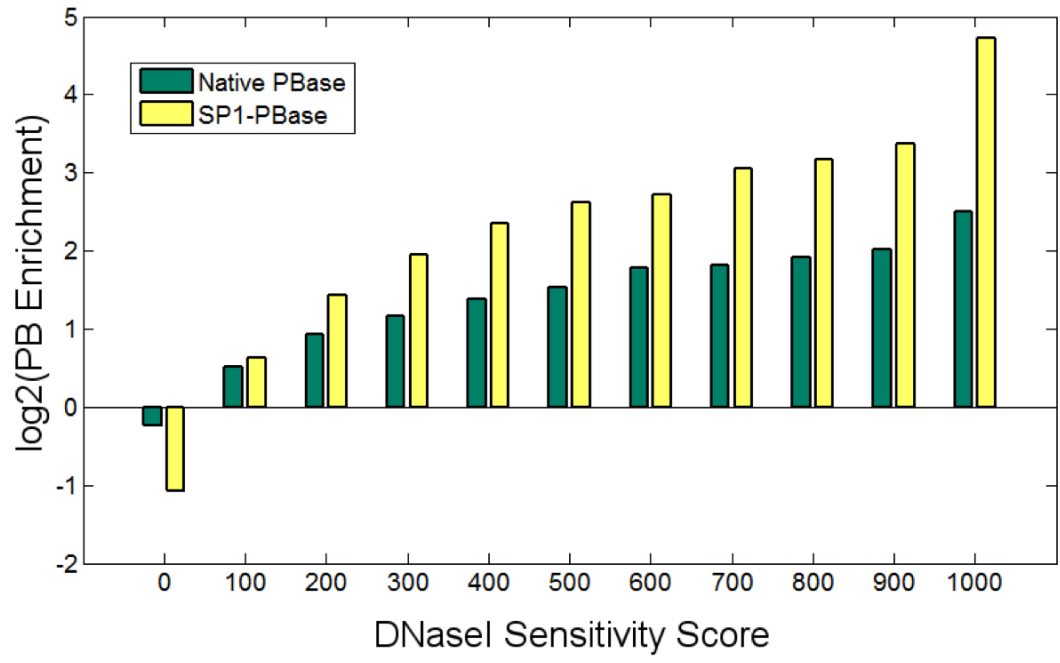

Figure S4

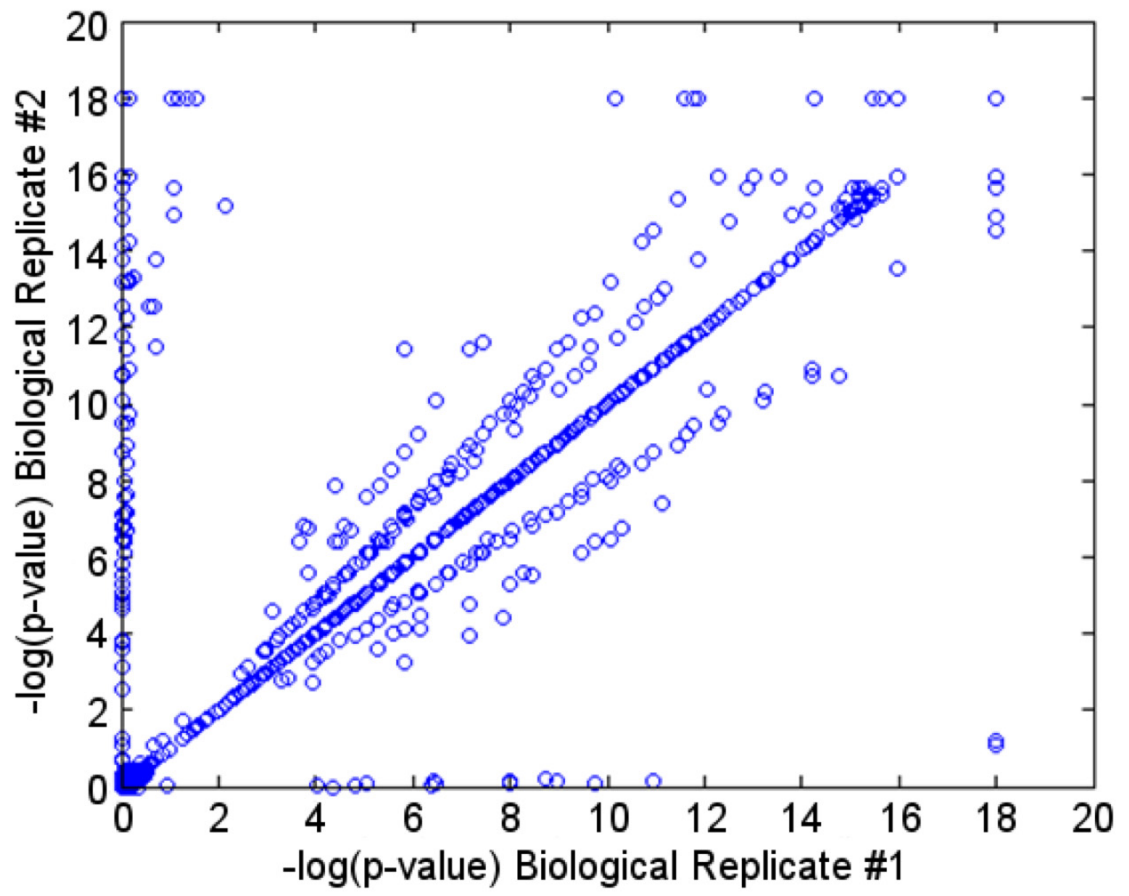

Figure S5

**Table S1-S5**

**Supporting Tables**

Tables S1-S5 are available for download at .
