# Supplementary material
Source: PubMed Central journal article supplement (PMC3296256)

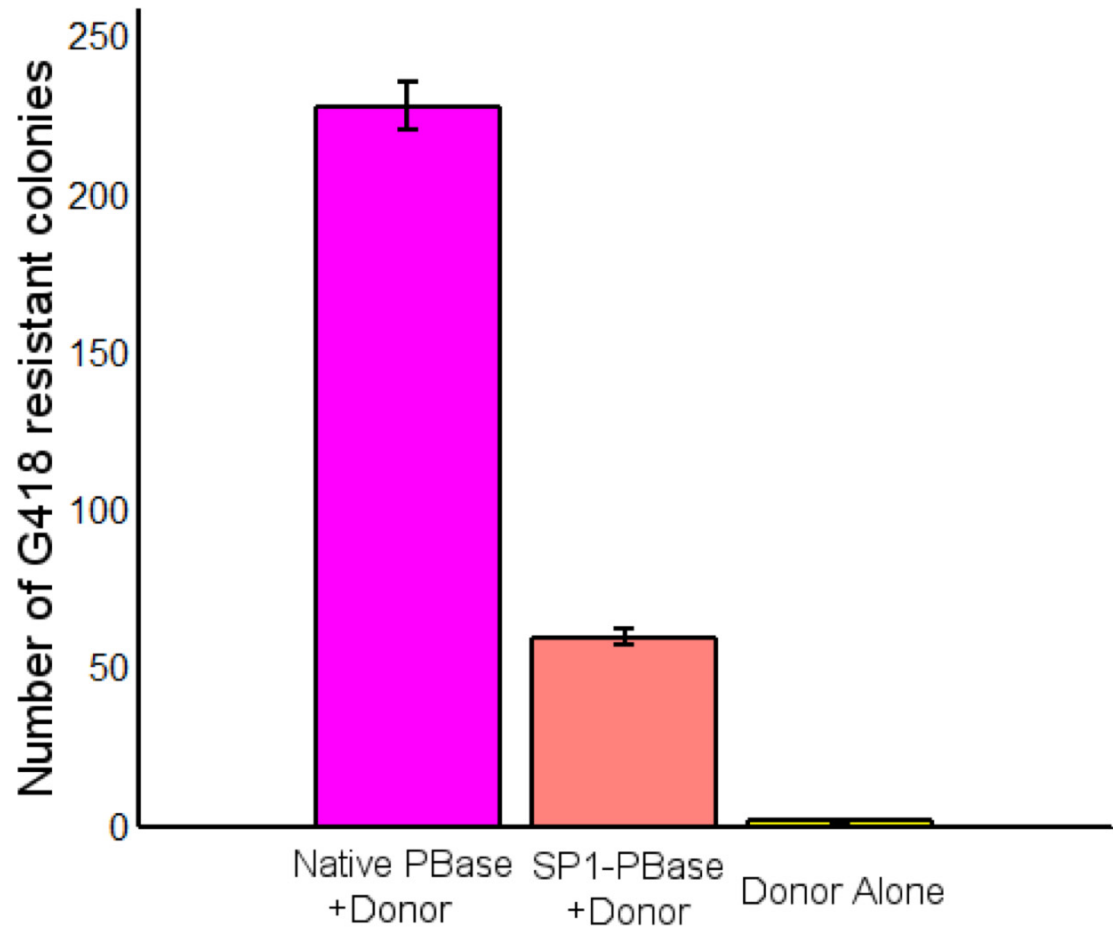

Figure S1

Supplement: supp_111.137315_FigureS1.pdf [file supp_111.137315_FigureS1.pdf]

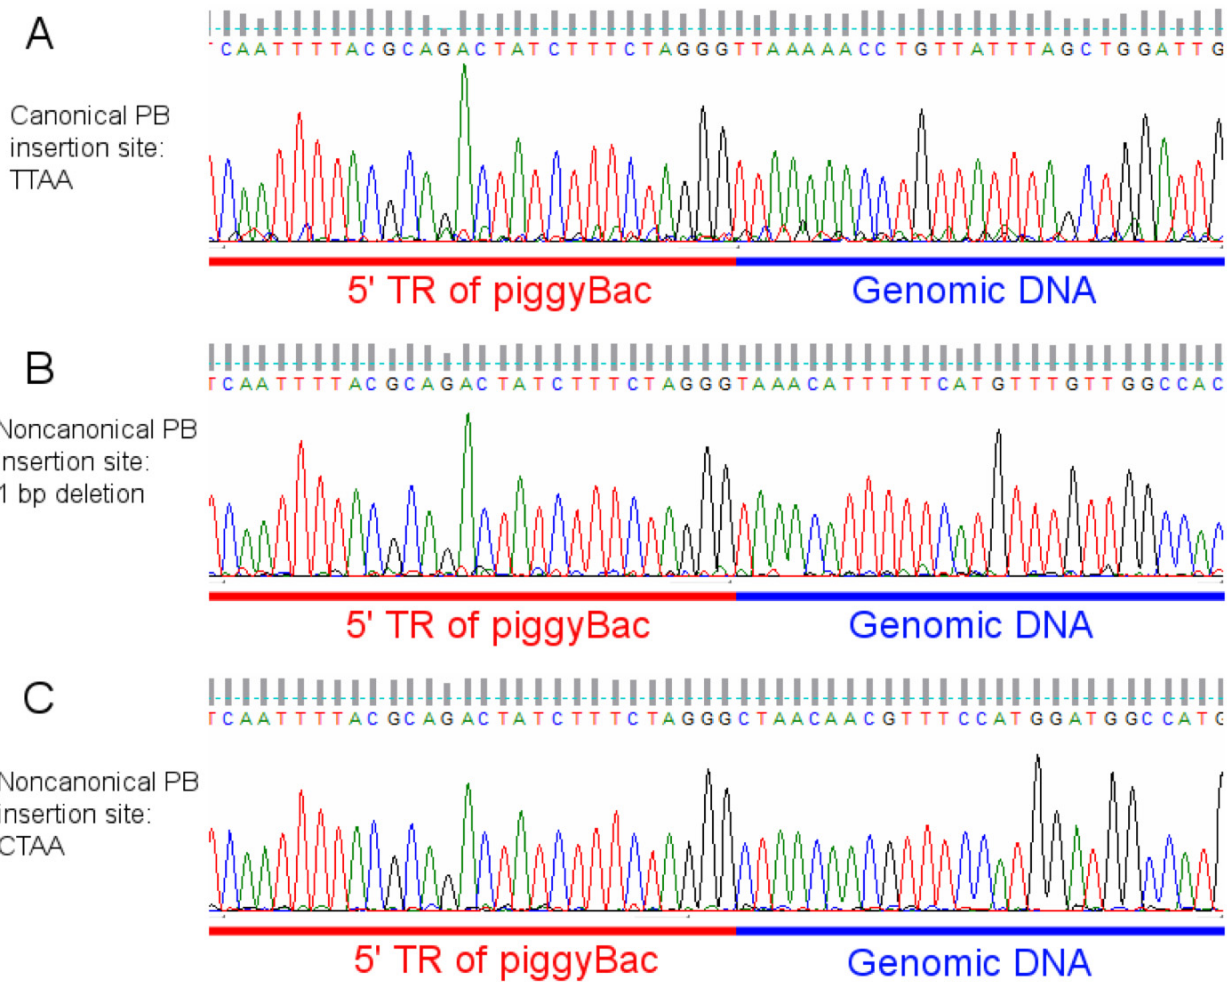

Figure S2

Supplement: supp_111.137315_FigureS2.pdf [file supp_111.137315_FigureS2.pdf]

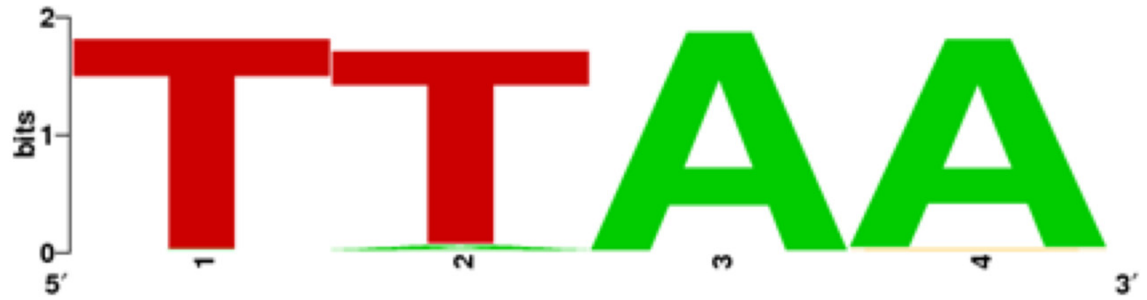

|   | A       | C       | G       | T       |
|---|---------|---------|---------|---------|
| 1 | 0.01153 | 0.00535 | 0.00155 | 0.98157 |
| 2 | 0.03691 | 0.00296 | 0.00150 | 0.95863 |
| 3 | 0.98946 | 0.00106 | 0.00250 | 0.00699 |
| 4 | 0.97966 | 0.00222 | 0.01290 | 0.00522 |

Figure S3

Supplement: supp_111.137315_FigureS3.pdf [file supp_111.137315_FigureS3.pdf]

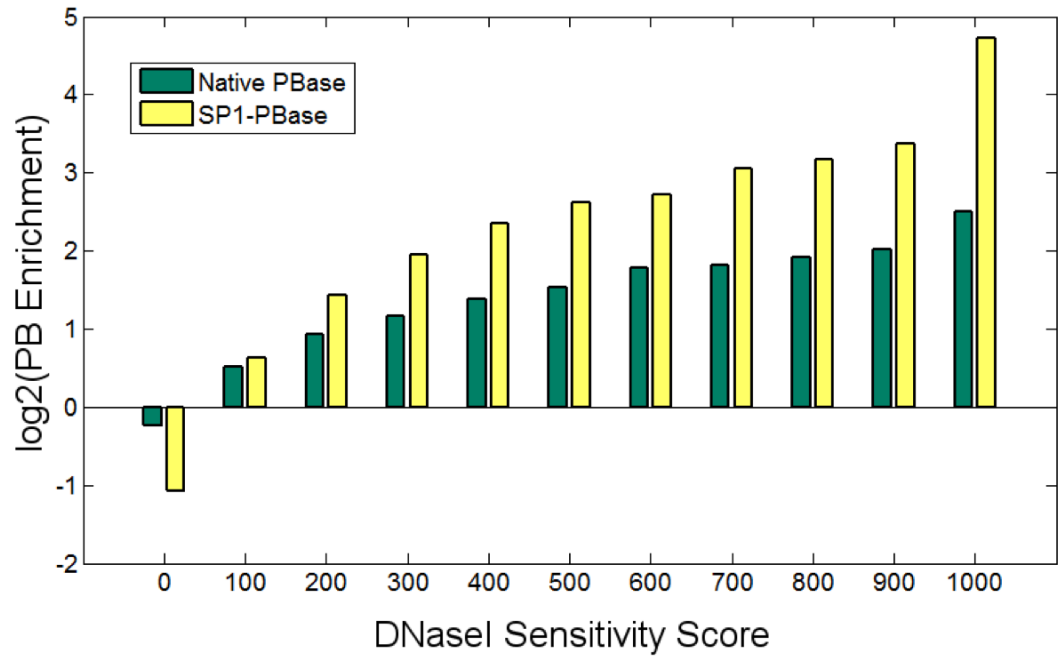

Figure S4

Supplement: supp_111.137315_FigureS4.pdf [file supp_111.137315_FigureS4.pdf]

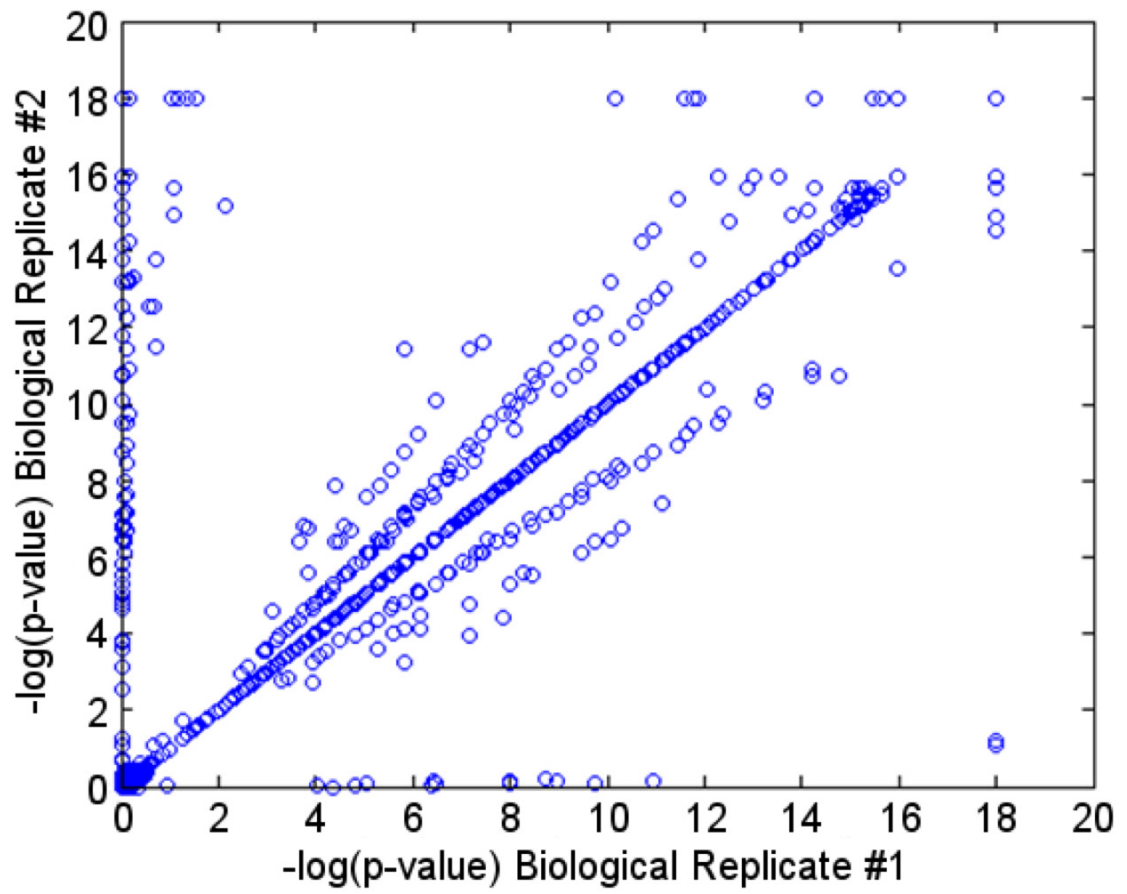

Figure S5

Supplement: supp_111.137315_FigureS5.pdf [file supp_111.137315_FigureS5.pdf]
